# Supplementary material for: Niche and Range Shifts of Aedes aegypti and Ae. albopictus Suggest That the Latecomer Shows a Greater Invasiveness
Source: MDPI journal article supplement (doi:10.3390/insects14100810), 2023-10-13
Supplement: s1 [file s1]

S3 Comparisons of AUC and TSS between real and null ecological niche models.

| <i>Aedes aegypti</i> (Introduced) |       |       | <i>Aedes aegypti</i> (Native) |       |       | <i>Aedes albopictus</i> (Introduced) |       |       | <i>Aedes albopictus</i> (Native) |       |       |
|-----------------------------------|-------|-------|-------------------------------|-------|-------|--------------------------------------|-------|-------|----------------------------------|-------|-------|
| Models                            | AUC   | TSS   | Models                        | AUC   | TSS   | Models                               | AUC   | TSS   | Models                           | AUC   | TSS   |
| Real                              | 0.984 | 0.876 | Real                          | 0.993 | 0.936 | Real                                 | 0.978 | 0.852 | Real                             | 0.978 | 0.816 |
| Real                              | 0.983 | 0.878 | Real                          | 0.993 | 0.923 | Real                                 | 0.979 | 0.854 | Real                             | 0.852 | 0.504 |
| Real                              | 0.985 | 0.881 | Real                          | 0.90  | 0.921 | Real                                 | 0.978 | 0.852 | Real                             | 0.979 | 0.818 |
| Real                              | 0.984 | 0.881 | Real                          | 0.992 | 0.929 | Real                                 | 0.979 | 0.852 | Real                             | 0.854 | 0.507 |
| Real                              | 0.984 | 0.880 | Real                          | 0.990 | 0.917 | Real                                 | 0.979 | 0.858 | Real                             | 0.978 | 0.819 |
| Null                              | 0.822 | 0.503 | Null                          | 0.889 | 0.620 | Null                                 | 0.816 | 0.504 | Null                             | 0.852 | 0.513 |
| Null                              | 0.821 | 0.489 | Null                          | 0.874 | 0.611 | Null                                 | 0.818 | 0.507 | Null                             | 0.979 | 0.814 |
| Null                              | 0.819 | 0.497 | Null                          | 0.856 | 0.562 | Null                                 | 0.819 | 0.513 | Null                             | 0.852 | 0.494 |
| Null                              | 0.813 | 0.459 | Null                          | 0.895 | 0.661 | Null                                 | 0.814 | 0.494 | Null                             | 0.979 | 0.820 |
| Null                              | 0.820 | 0.490 | Null                          | 0.851 | 0.558 | Null                                 | 0.820 | 0.513 | Null                             | 0.858 | 0.513 |

Paired sample *t* tests showed that all of  $P < 0001$ , and all of AUC and TSS in the null models were significantly lower than those in the real models.
