# Supplementary material for: Niche and Range Shifts of Aedes aegypti and Ae. albopictus Suggest That the Latecomer Shows a Greater Invasiveness
Source: MDPI journal article supplement (doi:10.3390/insects14100810), 2023-10-13
Supplement: s1 [file s1]

S1 Importance value of each predictors in the preliminary ecological niche models

| predictors                                                 | AAE (Introduced) | AAE (Native) | AAL (Introduced) | AAL (Native) |
|------------------------------------------------------------|------------------|--------------|------------------|--------------|
| Annual mean temperature                                    | 0.107            | 0.149        | 0.116            | 0.167        |
| Mean diurnal range(mean of monthly(max temp-min temp))     | 0.018            | 0.041        | 0.034            | 0.029        |
| Isothermality(bio2/bio7)( $\times 100$ )                   | 0.074            | 0.394        | 0.113            | 0.071        |
| Temperature seasonality (standard deviation $\times 100$ ) | 0.288            | 0.221        | 0.185            | 0.216        |
| Max temperature of the warmest month                       | 0.064            | 0.037        | 0.115            | 0.047        |
| Min temperature of the coldest month                       | 0.097            | 0.113        | 0.132            | 0.088        |
| Temperature annual range(bio5-bio6)                        | 0.106            | 0.095        | 0.105            | 0.056        |
| Mean temperature of the wettest quarter                    | 0.050            | 0.054        | 0.033            | 0.080        |
| Mean temperature of the driest quarter                     | 0.095            | 0.056        | 0.047            | 0.062        |
| Mean temperature of the warmest quarter                    | 0.147            | 0.143        | 0.270            | 0.048        |
| Mean temperature of the coldest quarter                    | 0.255            | 0.145        | 0.085            | 0.188        |
| Annual precipitation                                       | 0.055            | 0.042        | 0.138            | 0.169        |
| Precipitation of the wettest month                         | 0.080            | 0.061        | 0.159            | 0.158        |
| Precipitation of the driest month                          | 0.028            | 0.022        | 0.041            | 0.034        |
| Precipitation seasonality                                  | 0.021            | 0.018        | 0.014            | 0.026        |
| Precipitation of the wettest quarter                       | 0.046            | 0.052        | 0.102            | 0.112        |
| Precipitation of the driest quarter                        | 0.041            | 0.014        | 0.070            | 0.066        |
| Precipitation of the warmest quarter                       | 0.021            | 0.019        | 0.032            | 0.181        |
| Precipitation of the coldest quarter                       | 0.023            | 0.010        | 0.021            | 0.035        |
| Gross domestic product                                     | 0.161            | 0.214        | 0.166            | 0.059        |
| Density of population                                      | 0.115            | 0.128        | 0.112            | 0.159        |
| Fractions of cropland                                      | 0.060            | 0.037        | 0.046            | 0.044        |
| Fractions of managed pasture                               | 0.006            | 0.012        | 0.040            | 0.057        |
| Fractions of forested primary land                         | 0.012            | 0.022        | 0.018            | 0.019        |
| Fractions of non-forested primary land                     | 0.013            | 0.026        | 0.019            | 0.008        |
| Fractions of rangeland                                     | 0.025            | 0.041        | 0.031            | 0.091        |
| Fractions of potentially forested secondary land           | 0.007            | 0.011        | 0.006            | 0.006        |
| Fractions of potentially non-forested secondary land       | 0.009            | 0.017        | 0.006            | 0.010        |
| Fractions of urban                                         | 0.011            | 0.005        | 0.017            | 0.003        |
| Aspect                                                     | 0.011            | 0.011        | 0.010            | 0.011        |
| Elevation                                                  | 0.016            | 0.030        | 0.028            | 0.030        |
| Slope                                                      | 0.011            | 0.017        | 0.015            | 0.016        |

Note: AAE: *Aedes aegypti*; AAL: *Aedes albopictus*.
